# Supplementary material for: The Transcription Factors Atf1 and Pcr1 Are Essential for Transcriptional Induction of the Extracellular Maltase Agl1 in Fission Yeast
Source: PLoS One. 2013 Nov 5;8(11):e80572. doi: 10.1371/journal.pone.0080572 (PMC3818258; doi:10.1371/journal.pone.0080572)
Supplement: Table S2 — Oligonucleotide sequences used for qRT-PCR. (XLS) [file pone.0080572.s004.xls]

## Sheet: Table S2
Table S2. Oligo DNA sequences used for qRT-PCR.
Target gene	Primer name	Sequence	Number
act1	act1-RT-Fw	GGTCAAGATTGTTGCTCCTC	KRO-94
act1	act1-RT-Rv	CGCTCTCATCATACTCTTGC	KRO-95
fbp1	fbp1-RT-Fw	CCTTGTTGAACAAGCAGGAGG	KRO-144
fbp1	fbp1-RT-Rv	CCTCGACTTCATGTTTACTTC	KRO-145
gpx1	gpx1-RT-Fw-new1	CAACGTCGACCCTGTTTATC	KRO-174
gpx1	gpx1-RT-Rv-new1	TTCGAGATGTTCAGGCTTGC	KRO-175
agl1	agl1-RT-Fw	TCCTTGGTCTCACTGAATCC	KRO-90
agl1	agl1-RT-Rv	TTCCAGCTGTTGGCAAATGC	KRO-91
