# Supplementary material for: The Transcription Factors Atf1 and Pcr1 Are Essential for Transcriptional Induction of the Extracellular Maltase Agl1 in Fission Yeast
Source: PLoS One. 2013 Nov 5;8(11):e80572. doi: 10.1371/journal.pone.0080572 (PMC3818258; doi:10.1371/journal.pone.0080572)
Supplement: Table S3 — Oligonucleotide sequences used for ChIP analysis. (XLS) [file pone.0080572.s005.xls]

## Sheet: Table S3
Table S3. Oligo DNA sequences for ChIP analysis.
Target locus		Forward primers			Reverse primers
		Number	Primer name	Sequence	Number	Primer name	Sequence
act1 locus	act1	HKO-460	act1ORF-Fw1	TGGCTCTGGTATGTGCAAAG	HKO-461	act1ORF-Rv1	AGCTTCATCACCAACGTAGG
agl1 locus	-3 kb	HKO-536	chrI-2974377-Fw	TATGAATTCGTGTACCGCCC	HKO-537	chrI-2974377-Rv	ATGTTTGTCTGGCCAACGAC
	-2 kb	HKO-534	chrI-2973377-Fw	TGTTCACTAAACGACTCGGG	HKO-535	chrI-2973377-Rv	CTGCCACAGGCATAATTGAC
	-1 kb	HKO-532	chrI-2972377-Fw	TTAGCATCCACCACTAACATG	HKO-533	chrI-2972377-Rv	TGGGCTATCTAAACCTAAAGC
	0 kb	HKO-564	chrI-2971377-Fw2	CGCGCGTTTTAAAAAGGAGC	HKO-565	chrI-2971377-Rv2	TATAAGGTTCGCTTAGCCGC
	+1 kb	HKO-528	chrI-2970377-Fw	CCCAAAAGGTACGGGTTAAG	HKO-529	chrI-2970377-Rv	TACACGCGGACAGAAATTGG
	+2 kb	HKO-526	chrI-2969377-Fw	CCTAATGGAGTAGCAGTTGG	HKO-527	chrI-2969377-Rv	GCAGTATTCCATCCCAGAAG
	+3 kb	HKO-524	chrI-2968377-Fw	GGCACTCAAAACACCATCAC	HKO-525	chrI-2968377-Rv	ATCCATTCAACCTCCTCGTC
	+4 kb	HKO-522	chrI-2967377-Fw	ACTCATGCCACAGTGCAAAC	HKO-523	chrI-2967377-Rv	CAACGTCACGATCGATTGTC
	+5 kb	HKO-520	chrI-2966377-Fw	CTGGGTATGTCAAAGAGGTG	HKO-521	chrI-2966377-Rv	TATTCTATGGGCCTACGAGC
fbp1 locus	fbp1-Pro	HKO-612	fbp1-qPCR1-for	GCTTCCATCATGGCTCGTTG	HKO-613	fbp1-qPCR1-rev	TGTGTTGTCTCTCTCCAGTG
	fbp1-ORF	HKO-614	fbp1-qPCR2-for	CCTTGTTGAACAAGCAGGAG	HKO-615	fbp1-qPCR2-rev	AGCCAAATACTGCTTTTTCCG
gpx1 locus	gpx1-Pro	HKO-620	gpx1-qPCR3-for	TCAGCTGGAAACATAAGTAGG	HKO-621	gpx1-qPCR3-rev	GGAGCCAAGTCGTAGAAATG
	gpx1-ORF	HKO-622	gpx1-qPCR4-for	AGAAGCAACTTGGCCTTGAG	HKO-623	gpx1-qPCR4-rev	TAAAGGACACTCTCGATATCG
